# Supplementary material
Source: PubMed Central journal article supplement (PMC3463850)
Supplement: emboj2012246s1.pdf [file emboj2012246s1.pdf]

# Supplementary data 1-7

**Fig.S1**

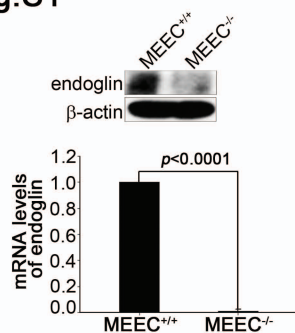

**Fig.S2**

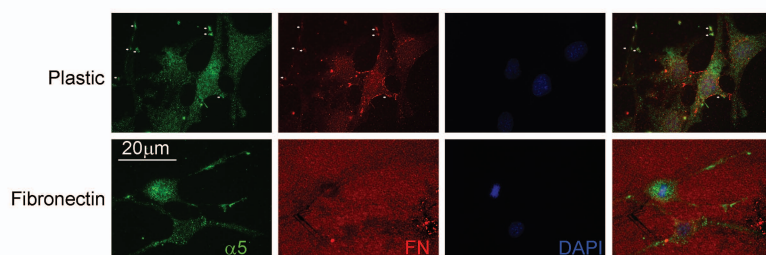

**Fig.S3**

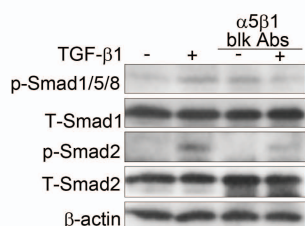

**Fig.S4**

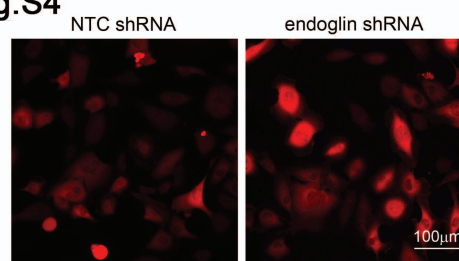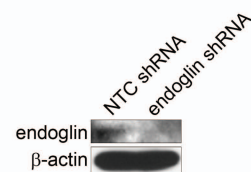

**Fig.S5**

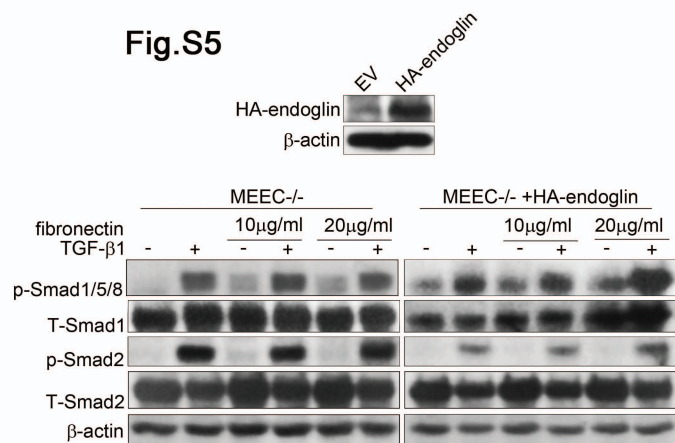

**Fig.S6**

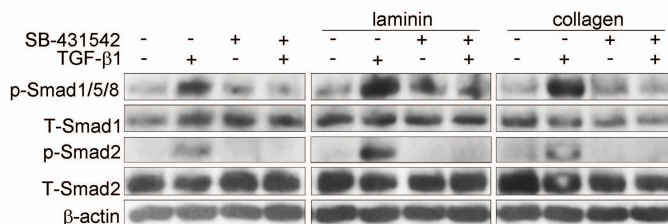

**Fig.S7**

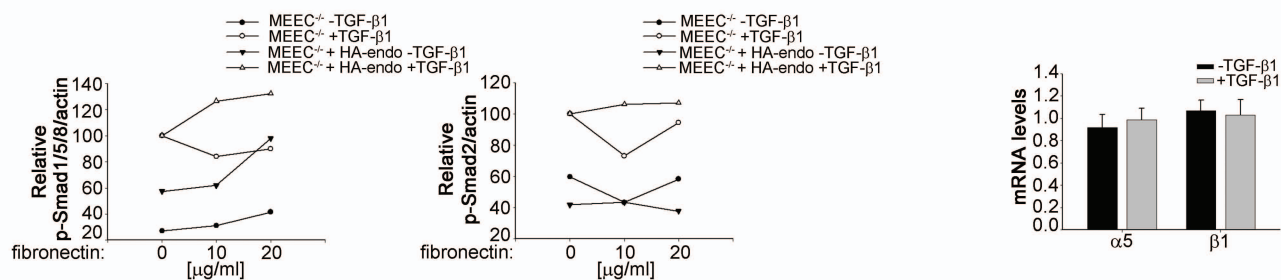

# Supplementary data 8-16

**Fig. S8**

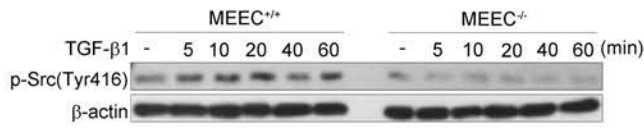

**Fig.S9**

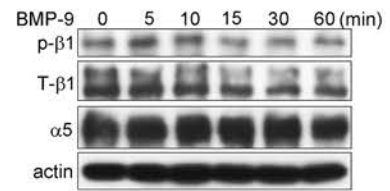

**Fig.S10**

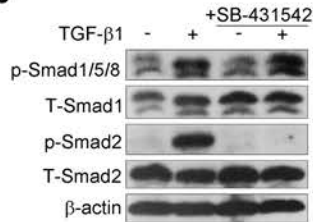

**Fig.S11**

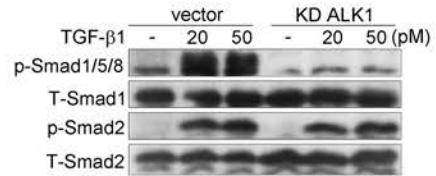

**Fig. S12**

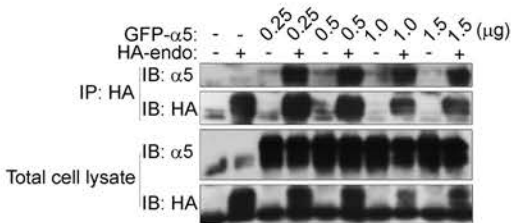

**Fig.S13**

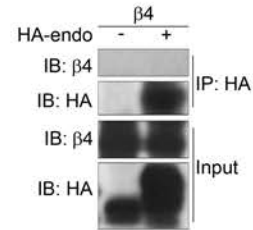

**Fig.S14**

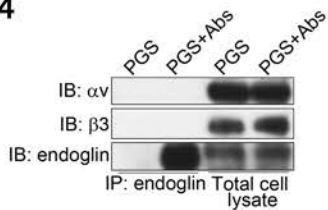

**Fig.S16**

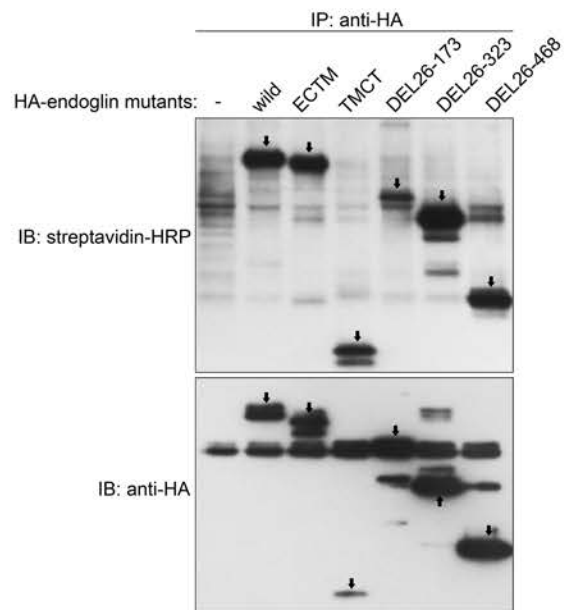

**Fig.S15**

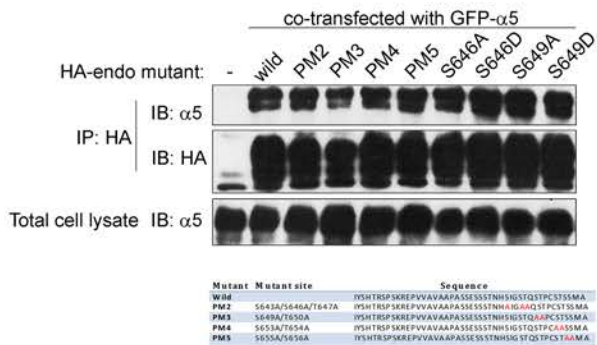





## Supplementary Figure Legends

**Supplementary Figure S1.** Endoglin protein and mRNA levels in MEEC +/+ and MEEC-/- cells were determined using western blot, with  $\beta$ -actin as a loading control (top), and real time PCR (bottom), respectively. Forward primer sequence for murine endoglin: 5'-GCTACCATCCCTTACCTCCAG-3', reverse primer sequence for murine endoglin: 5'-CTTCTGGCAAGCACAGAATG-3'.

**Supplementary Figure S2.** HMEC-1 cells were cultured in non-ECM coated (plastic) or 5 $\mu$ g/ml fibronectin coated plastic dishes for 12h.  $\alpha$ 5 integrin and fibronectin were detected by immunofluorescent microscopy. Nuclei were stained using DAPI, and a merged image of the  $\alpha$ 5 integrin and fibronectin images is presented in the far right panels.

**Supplementary Figure S3.** HMEC-1 cells were cultured on plastic in the absence of exogenous fibronectin, serum starved for 5h, pretreated with 10 $\mu$ g/ml integrin  $\alpha$ 5 $\beta$ 1 function-blocking antibody (blk Abs) for 1h, followed by treatment with 50pM TGF- $\beta$ 1 for 30 min, and the cell lysates analyzed with the indicated antibodies.

**Supplementary Figure S4.** HMEC-1 cells were adenovirally infected with dsRed expressing shRNA to a non-targeted control (NTC) or endoglin for 48h. Infection efficiency (dsRed expression, top) was assessed by fluorescence microscopy and knockdown efficiency (bottom) relative to NTC was assessed by western blot, with  $\beta$ -actin as a loading control.

**Supplementary Figure S5.** MEEC -/- cells were nucleofected with empty vector or HA-tagged human endoglin for 24h, cultured in dishes coated with the indicated doses of fibronectin, serum starved for 6h, treated with 50pM TGF- $\beta$ 1 for 30min, and the cell lysates analyzed with the indicated antibodies. Data are quantitated below.

**Supplementary Figure S6.** HMEC-1 cells were cultured in non-coated, 10 $\mu$ g/ml laminin or 10 $\mu$ g/ml collagen coated dishes, serum starved for 5h, pretreated with 10 $\mu$ M ALK5 inhibitor, SB-431542 for 1h, then treated with or without 50pM TGF- $\beta$ 1, and the cell lysates analyzed with the indicated antibodies.

**Supplementary Figure S7.** HMEC-1 cells were treated with or without 100pM TGF- $\beta$ 1 for 30min. mRNA levels of integrin  $\alpha$ 5 and  $\beta$ 1 were assessed using real

time PCR. Forward primer sequence for human  $\alpha 5$ : 5'-TGCTCCTAGGTCTACTCATCTAC-3', reverse primer sequence for human  $\alpha 5$ : 5'-ATGGGAGTCTGAAATTGGGAG-3'; Forward primer sequence for human  $\beta 1$ : 5'-TGTAAGGAGAAGGATGTTGACG-3'; reverse primer sequence for human  $\beta 1$ : 5'-CAACCACACCAGCTACAATTG-3'.

**Supplementary Figure S8.** MEEC +/+ and MEEC -/- cells were serum starved for 6h prior to treatment with the indicated doses of TGF- $\beta 1$  treatment for 30min, and the cell lysates analyzed with the indicated antibodies.

**Supplementary Figure S9.** HMEC-1 cells were serum starved for 6h prior to treatment with 2ng/ml BMP-9 for indicated times, and the cell lysates analyzed with the indicated antibodies.

**Supplementary Figure S10.** HMEC-1 cells were cultured on 10 $\mu$ g/ml fibronectin coated dishes, serum starved for 5h, pretreated with 10 $\mu$ M ALK5 inhibitor, SB-431542 for 1h, then treated with or without 50pM TGF- $\beta 1$ , and the cell lysates analyzed with the indicated antibodies.

**Supplementary Figure S11.** HMEC-1 cells were adenovirally infected with empty virus or ALK-1 kinase dead (KD ALK-1) for 48h, treated with 50pM TGF- $\beta 1$  for 30min, and the cell lysates analyzed with the indicated antibodies.

**Supplementary Figure S12.** Anti-HA immunoprecipitates were prepared from COS7 cells expressing HA-endoglin with the indicated levels of GFP- $\alpha 5$  integrin. HA-endoglin and  $\alpha 5$  integrin were detected in immunoprecipitates (IP) and total cell lysates using western blot analysis.

**Supplementary Figure S13.** Anti-HA immunoprecipitates were prepared from COS7 cells expressing HA-endoglin with  $\beta 4$  integrin. HA-endoglin and  $\beta 4$  were detected in immunoprecipitates (IP) and total cell lysates using western blot analysis.

**Supplementary Figure S14.** Immunoprecipitates were prepared from MEEC+/+ cells with P3D1 antibody to endoglin.  $\alpha v$  or  $\beta 3$  integrin was detected in immunoprecipitates (IP) and cell lysates by western blot analysis.

**Supplementary Figure S15.** Anti-HA immunoprecipitates were prepared from COS7 cells expressing GFP- $\alpha 5$  integrin with HA-endoglin or different phosphorylation site mutants of HA-endoglin on as indicated in the bottom panel. HA-endoglin and  $\alpha 5$  were detected in immunoprecipitates (IP) and total cell lysates using western blot analysis.

**Supplementary Figure S16.** COS7 cells were transfected with HA-endoglin or or indicated HA-endoglin mutants for 24h, labeled with Sulfo-NHS-LC-Biotin, immunoprecipitated with anti-HA antibody, resolved by SDS-PAGE, and Western blots were performed using streptavidin-horseradish peroxidase (top) or HA antibody (below). Arrows indicate the size of the different deletion constructs.

Supplementary Figure S17. MEEC<sup>+/+</sup> cells were cultured in dishes coated with PBS, or 10 $\mu$ g/ml fibronectin. Interactions between endogenous integrin  $\alpha$ 5 and integrin  $\beta$ 1 were assessed by Duolink assay. Nuclei were stained using DAPI. The data are quantitated on the right.

**Supplementary Figure S18.** COS7 cells expressing HA-endoglin and myc-ALK-1 were cultured in dishes coated with PBS, 10 $\mu$ g/ml collagen, or 10 $\mu$ g/ml fibronectin together with or without 10mg/ml integrin  $\alpha$ 5 $\beta$ 1 function blocking antibody for 1h. Interactions between HA-endoglin and myc-ALK-1 were assessed by Duolink assay. Nuclei were stained using DAPI. The data are quantitated on the right. The number of endoglin/ALK-1 complexes per cell +/- SD (N=20 cells) from one representative experiment of two independent experiments is presented.

**Supplementary Figure S19.** Anti-Flag immunoprecipitates were prepared from COS7 cells expressing Flag- $\beta$ -arrestin2 with HA-endoglin or HA-endoglin T650A mutant. HA-endoglin and Flag- $\beta$ -arrestin2 were detected in IP and total cell lysates by western blot analysis.

**Supplementary Figure S20.** MEEC <sup>+/+</sup> and <sup>-/-</sup> cells were serum starved for 5h. Clathrin dependent endocytosis was inhibited by potassium (K) depletion for 1h. Cells were treated with 50pM TGF- $\beta$ 1 for 30min, and the cell lysates analyzed with the indicated antibodies.

**Supplementary Figure S21.** MEEC <sup>+/+</sup> and <sup>-/-</sup> cells were serum starved for 5h. Clathrin-independent endocytosis was inhibited by adding 100 $\mu$ g/ml nystatin for 1h. 0.25 $\mu$ M cholesterol was used to rescue clathrin-independent endocytosis. Cells were treated with 50pM TGF- $\beta$ 1 for 30min, and the cell lysates analyzed with the indicated antibodies.

**Supplementary Figure S22.** MEEC  $+/+$  and  $-/-$  cells were serum starved for 5h. Clathrin-independent endocytosis was inhibited by adding 100 $\mu$ g/ml nystatin for 1h. 0.25 $\mu$ M cholesterol was used to rescue clathrin-independent endocytosis. Cells were treated with 50pM TGF- $\beta$ 1 for 30min, and the cell lysates analyzed with the indicated antibodies.

**Supplementary Figure S23.** (A) HMEC-1 cells were plated in the transwells coated with non-ECM, or 20 $\mu$ g/ml fibronectin, pretreated with or without 5ng/ml BMP-9 and assessed for migration after 8 h.

**Supplementary Figure S24.** HMEC-1 cells were cultured on the Matrigel mixed with or without 50 $\mu$ g/ml fibronectin with 5ng/ml BMP-9 treatment for indicated times. Images were taken at 4 $\times$  microscopy, and tubules were counted using Image J.

**Supplementary Figure S25.** Alignment of endoglin sequences across species (rat, mouse, human and pig). The RGD sequence in human endoglin is highlighted.



## Supplementary materials and methods:

**Protein Overexpression and Knockdown** MEECs were nucleofected with cDNA constructs using Amaxa nucleofection system as described previously (Lee & Blobel, 2007). HMEC-1s were infected with either a non-targeting vector control or shRNA endoglin-expressing adenovirus (targeting intracellular sequence) at 50 MOI and incubated for 72 h before harvest. COS7 cells were transfected using Lipofectamine™ 2000 transfection reagent as described by the manufacturer.

**Western blot analysis:** To detect phosphorylated and total Smad1,2,5,8, integrin  $\beta$ 1 and FAK, HMEC or MEEC cells were serum starved for 6 hours, and treated with 50 pM or the indicated doses of TGF- $\beta$ 1, or 2 $\mu$ g/ml or indicated doses of BMP-9 for 30min or the indicated times. Cells were then lysed using 2 $\times$ sample buffer and subjected to western blot analysis. To detect ECM substrate effects on TGF- $\beta$  or BMP-9 signaling, 6-well or 12-well plates were coated with 10 $\mu$ g/ml or the indicated doses of ECM components for 1h, HMEC-1 or MEEC cells were cultured in the coated dishes overnight, serum starved for 6h, and treated with 50 pM TGF- $\beta$ 1 or 2 $\mu$ g/ml BMP-9 for 30min. Dishes coated with PBS were used as a negative control. Integrin  $\alpha$ 5, integrin  $\beta$ 1, phosphospecific Smad1/5/8 and Smad2/3, as well as their respective total Smad antibodies, were all purchased from Cell Signaling. HA antibody was purchased from Roche. Phosphorylated integrin  $\beta$ 1 antibody was purchased from Abcam.

**Cell-substrate adhesion assay:** 96-well dishes were coated with 100 $\mu$ l of the indicated concentrations of ECM substrates for 60 min. at room temperature. The wells were then blocked with 200 $\mu$ l of 10mg/ml heat-denatured BSA solution for 30 min. at room temperature and washed with 100 $\mu$ l PBS. 50 $\mu$ l PBS and 50 $\mu$ l of  $5 \times 10^5$  HMEC-1 cells were then added, incubated for 15min at 37°C. Nonadherent and loosely attached cells were removed by tapping the plate, and washed 3 times with 100 $\mu$ l PBS. Cells were then fixed with 4% paraformaldehyde for 15min in room temperature. After washing 3 times with PBS, the cells were

stained with Crystal Violet for 10min, washed with PBS 3 times, allowed to dry, and then 2% SDS was added and the plates incubated at room temperature for 30min, and read at 595nm.

**Co-immunoprecipitation:** MEEC cells cultured in 10 ml dishes or COS7 co-expressing 1.5 µg HA-endoglin and 0.5 µg β1 or GFP-α5 for 24h in 6 well plates were washed with PBS, then lysed on ice with lysis buffer (20mM Tris-HCl pH8, 137mM NaCl, 10% glycerol, 1% NP-40, 2mM EDTA, 10 mM NaF, 5µg/ml leupeptin, 1mM PMSF, 1mM Na<sub>3</sub>VO<sub>4</sub>). The lysates were precleared by centrifugation and incubated with 30µl protein G-agarose beads for 2h, incubated with 5µg anti-HA or 10µg P3D1 antibodies (Millipore) at 4°C overnight, and then incubated with 50µl protein G-agarose beads for 1h. The immunoprecipitates were collected by centrifugation, the pellets washed with lysis buffer, and stored in 2X sample buffer prior to Western blot analysis.

**Immunofluorescence:** MEEC<sup>-/-</sup> cells expressing of HA-endoglin and GFP-α5 were washed with PBS, fixed with 4% paraformaldehyde, permeabilized in 0.1% Triton X-100/PBS for 5 min and then blocked with 5% bovine serum albumin in PBS for 1 h. HA-endoglin, GFP-α5, and Rab5 or EAA1 were detected using P3D1, anti-GFP, and anti-Rab5 or anti-EAA1 at 1:200 dilution rate, respectively, for 1 h at room temperature. Cells were washed with PBS and incubated with appropriate secondary fluorophore-conjugated antibodies for 1 h at room temperature, washed, then mounted with Prolong Anti-Fade (Sigma).

***K<sup>+</sup> depletion and Nystatin treatment:***

Clathrin-dependent and independent endocytosis were inhibited by potassium (K) and cholesterol depletion, respectively (Di Guglielmo et al, 2003). Briefly, MEEC cells were incubated in MCDB131:water (1:1) for 5 min at 37°C followed by incubation in minimal media (20 mM Hepes at pH 7.5, 140 mM sodium chloride, 1 mM calcium chloride, 1 mM magnesium sulphate, 5.5 mM glucose and 0.5% BSA) for 1h at 37°C. Control cells were incubated in minimal media supplemented with 10 mM potassium chloride. Cholesterol depletion was carried

out by incubating cells in 100 µg/ml of Nystatin (Sigma) for 1 h at 37°C. Control cells were co-treated with 0.25µM cholesterol.
