# Supplementary material
Source: PubMed Central journal article supplement (PMC3463850)

**Fig.1 A**

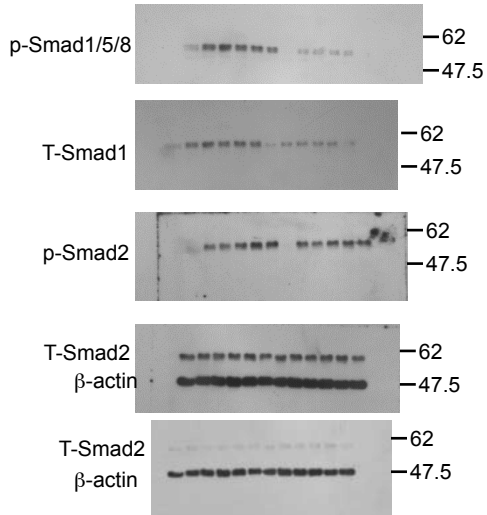

**Fig.1 B**

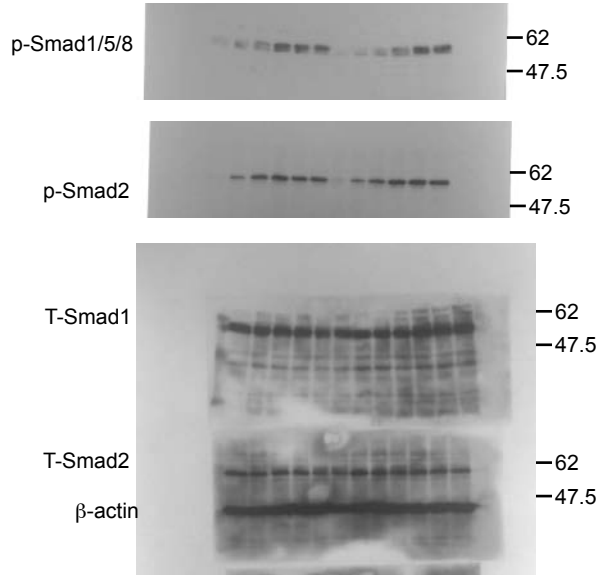

**Fig.1 C**

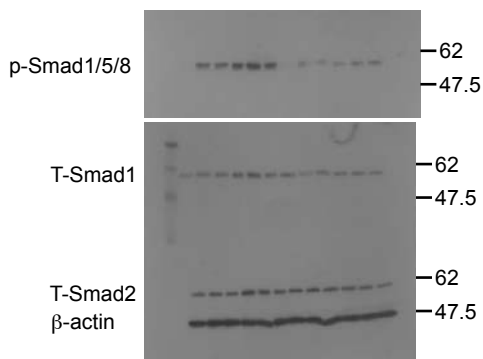

**Fig.1 D**

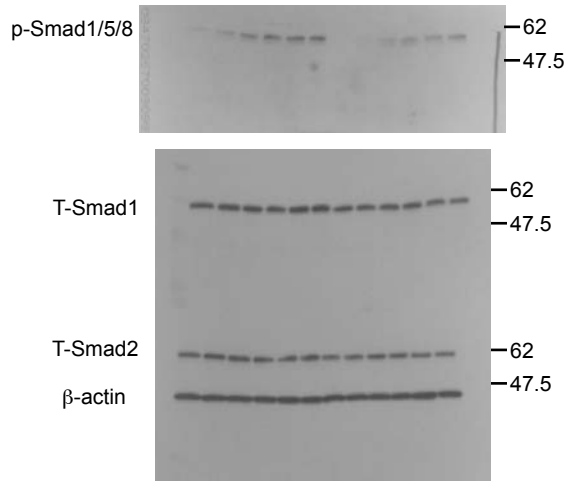

Supplement: emboj2012246s2.pdf [file emboj2012246s2.pdf]

### Fig.2 B

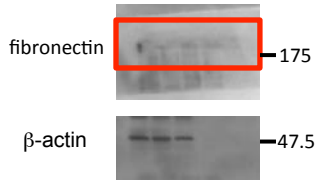

### Fig.2 C

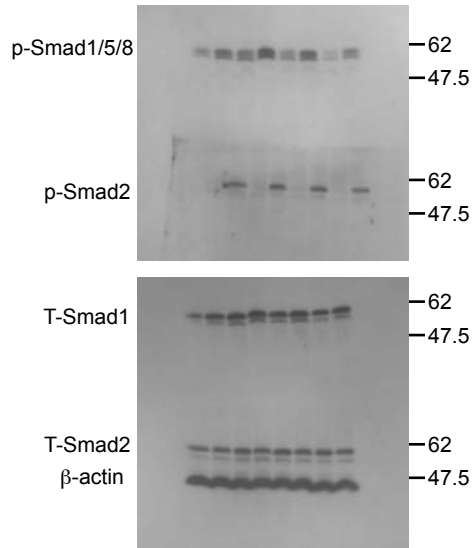

### Fig.2 D

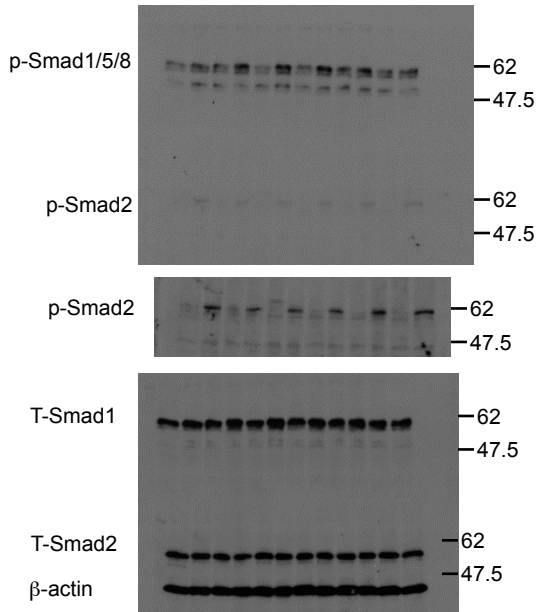

### Fig.2 E

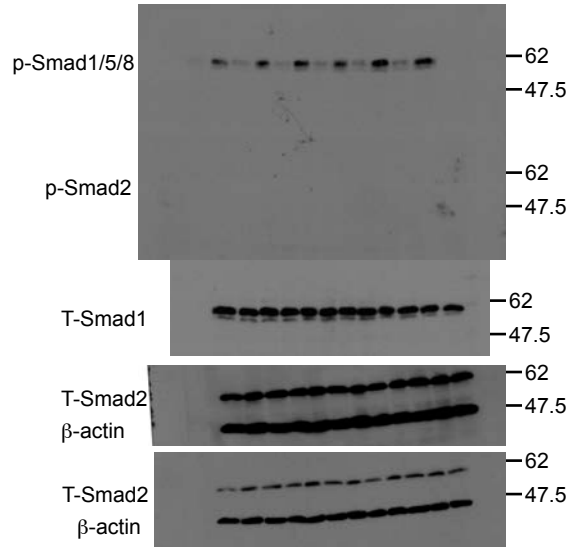

### Fig.2 F

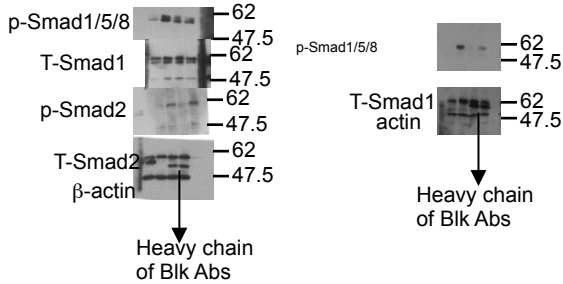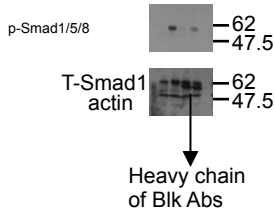

Supplement: emboj2012246s3.pdf [file emboj2012246s3.pdf]

**Fig.4A**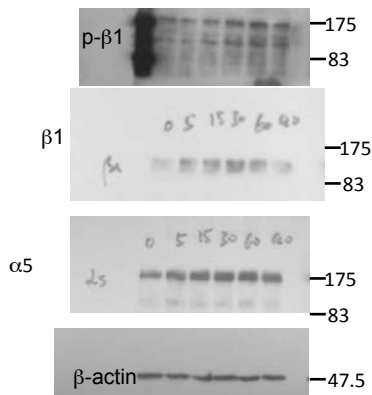**Fig.4B**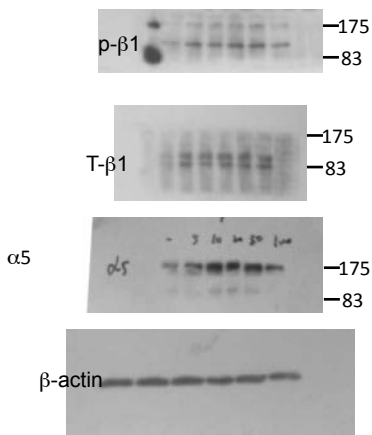**Fig.4C**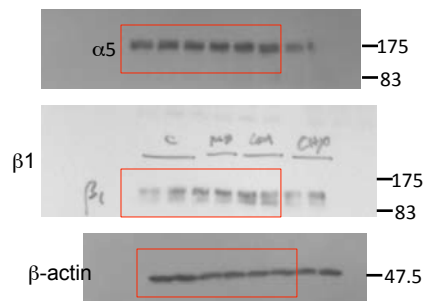**Fig.4F**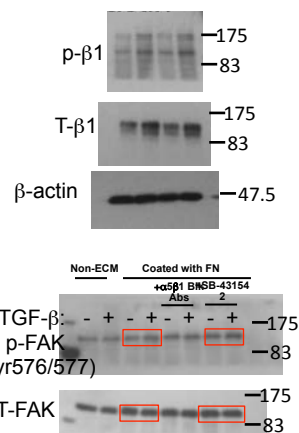**Fig.4D**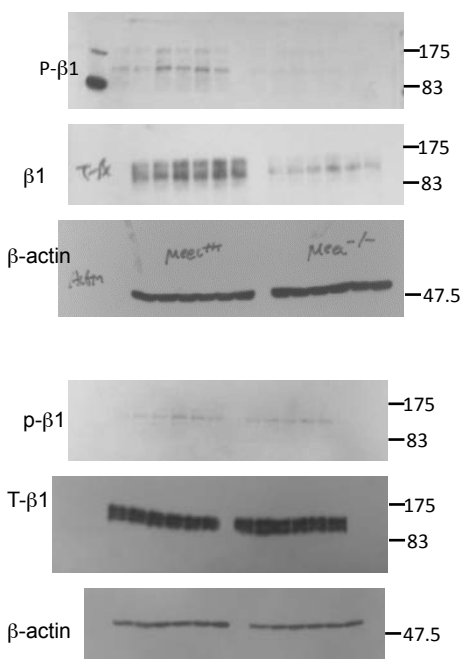**Fig.4E**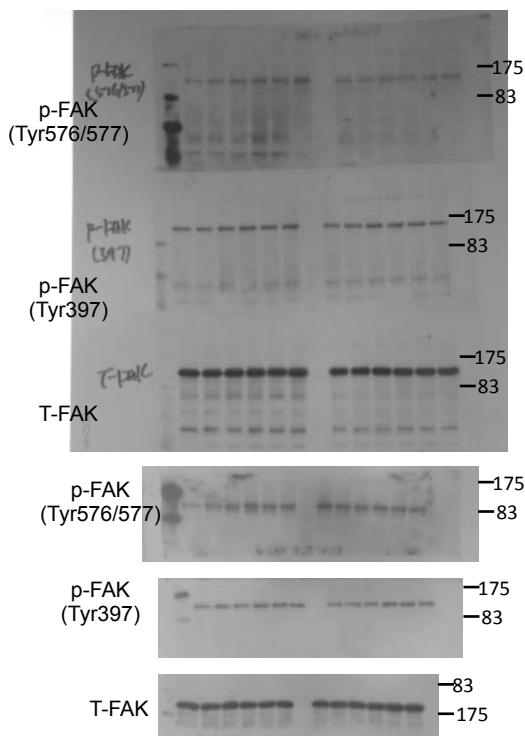**Fig.4G**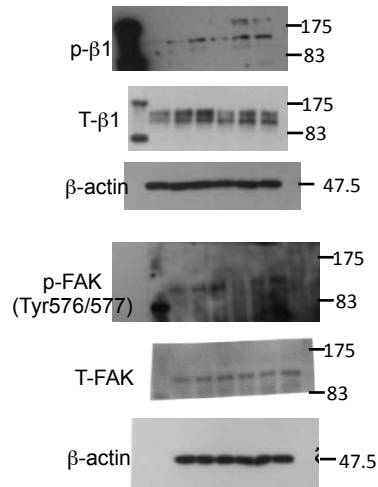

Supplement: emboj2012246s5.pdf [file emboj2012246s5.pdf]

**Fig.5A**

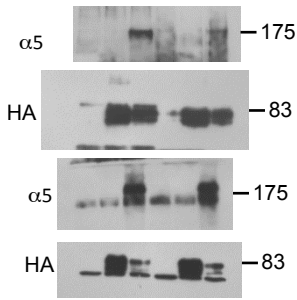

**Fig.5B**

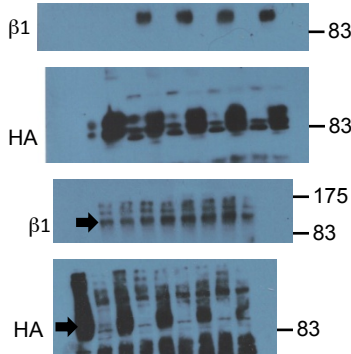

**Fig.5C**

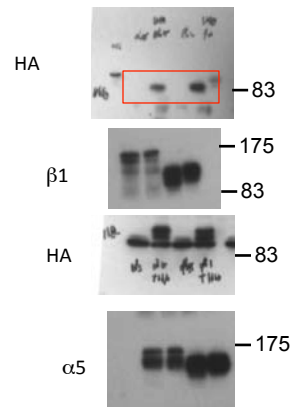

**Fig.5D**

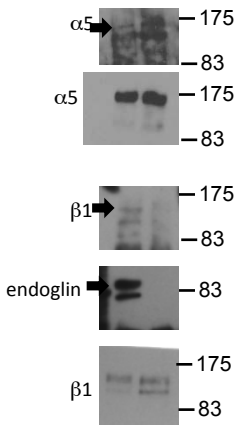

**Fig.5E**

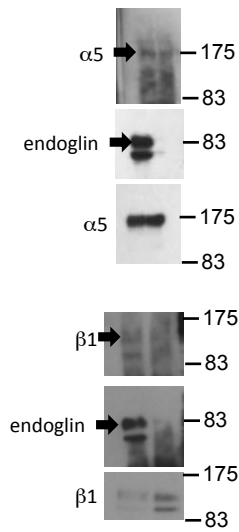

**Fig.5F**

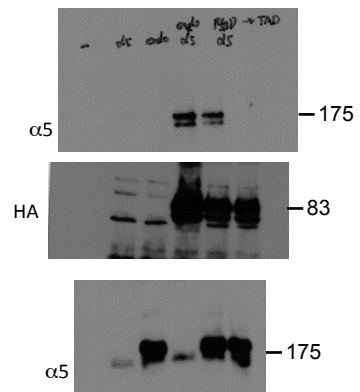

**Fig.5G**

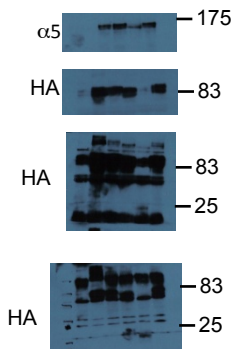

**Fig.5H**

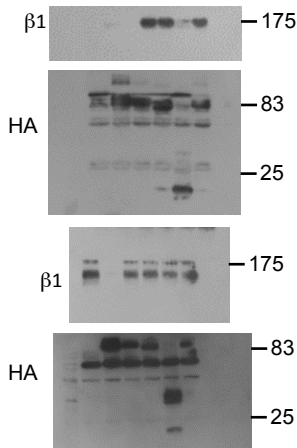

**Fig.5I**

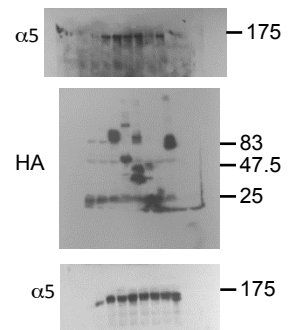

Supplement: emboj2012246s6.pdf [file emboj2012246s6.pdf]

**Fig.7C**

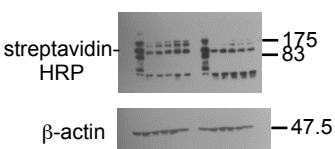

**Fig.7D**

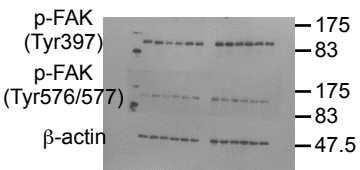

**Fig.7E**

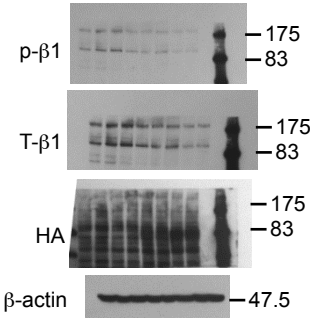

Supplement: emboj2012246s8.pdf [file emboj2012246s8.pdf]

# Fig.8E

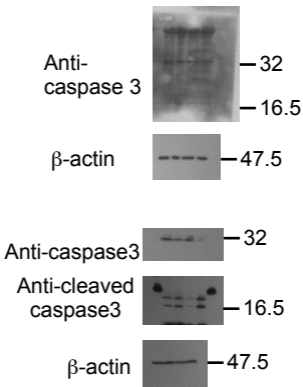

Supplement: emboj2012246s9.pdf [file emboj2012246s9.pdf]
